# Supplementary material for: Provision of medical supply kits to improve quality of antenatal care in Mozambique: a stepped-wedge cluster randomised trial
Source: PubMed Central journal article supplement (PMC5732314; doi:10.1016/s2214-109x(17)30421-7), 2017-12-12
Supplement: mmc1.pdf [file mmc1.pdf]

# THE LANCET

## Global Health

### Supplementary appendix

This appendix formed part of the original submission and has been peer reviewed. We post it as supplied by the authors.

Supplement to: Betrán AP, Bergel E, Griffin Se et al, for the WHO Antenatal Care Trial in Mozambique Research Group. Provision of medical supply kits to improve quality of antenatal care in Mozambique: a stepped-wedge cluster randomised trial. *Lancet Glob Health* 2018; **6**: e57–65.

## Supplementary Appendix

### Provision of medical supply kits to improve quality of antenatal care in Mozambique: a stepped wedge cluster randomized trial

---

#### Table of Contents

|     |                                                                                           |    |
|-----|-------------------------------------------------------------------------------------------|----|
| 1.  | Health facilities included in this trial, location and date of launch of the intervention | 2  |
| 2.  | Components of the ANC visits as per national guidelines                                   | 3  |
| 3.  | Components of Kit A and Kit B                                                             | 4  |
| 4.  | Photos of the kits                                                                        | 5  |
| 5.  | Detailed list of outcomes and definitions                                                 | 6  |
| 6.  | Practice delivery rates at baseline (Step 1)                                              | 8  |
| 7.  | Data management and data quality assurance                                                | 9  |
| 8.  | Diagram of first and follow-up ANC visits independently                                   | 9  |
| 9.  | Effect of the intervention in follow-up antenatal care visits                             | 10 |
| 10. | Effect of the intervention in composite outcome                                           | 13 |
| 11. | Ethical aspects of the trial                                                              | 13 |
| 12. | Checklist of items to be included when reporting a cluster randomized controlled trial    | 14 |
| 13. | Data collection instrument: ANC logbook                                                   | 16 |

## 1. Health facilities included in this trial, location and date of launch of the intervention

Clusters were antenatal care (ANC) clinics in health facilities. The 10 participating ANC clinics were selected purposely by the Ministry of Health (MOH) according to its programmatic activities and priorities and with geographical representation of the three regions of Mozambique (North, Center and South). Table S1 shows the health facilities listed chronologically according to the start of the intervention. It also shows the date of the launch of the intervention in each facility as well as its location.

**Table S1: Health facilities listed in chronological order according to the start of the intervention.** The date of the launch of the intervention in each facility is also shown as well as its location. In addition, the table shows the approximate number of nurses providing ANC care in each facility and the number of first ANC visits attended in 2011.

| Order entered intervention | Health Center (HC)                                   | Region and location          | Setting | Number of first ANC visits attended in 2011* | Number of nurses providing ANC (approx.) | Date launch intervention |
|----------------------------|------------------------------------------------------|------------------------------|---------|----------------------------------------------|------------------------------------------|--------------------------|
| 1                          | <b>HC of Anchilo</b>                                 | North: Nampula Province      | Rural   | 1894                                         | 2                                        | June 2 2014              |
| 2                          | <b>HC N° 2</b>                                       | Central: Tete City           | Urban   | 2778                                         | 4                                        | August 1 2014            |
| 3                          | <b>HC annexed to the rural hospital of Songo</b>     | Central: Tete Province       | Rural   | 1281                                         | 2                                        | October 3 2014           |
| 4                          | <b>HC annexed to the district hospital of Dondo</b>  | Central: Sofala Province     | Rural   | 2728                                         | 4                                        | November 28 2014         |
| 5                          | <b>HC da Matola II</b>                               | South: Maputo Province       | Urban   | 3276                                         | 6                                        | January 30 2015          |
| 6                          | <b>HC Iro de Maio</b>                                | South: Maputo City           | Urban   | 3165                                         | 2                                        | April 8 2015             |
| 7                          | <b>HC annexed to the rural hospital of Chowke</b>    | South: Gaza Province         | Rural   | 3480                                         | 6                                        | June 4 2015              |
| 8                          | <b>HC annexed to the rural hospital of Montepuez</b> | North: Cabo Delgado Province | Rural   | 4182                                         | 4                                        | August 5 2015            |
| 9                          | <b>HC of Chibuto</b>                                 | South: Gaza Province         | Rural   | 9756                                         | 6                                        | October 1 2015           |
| 10                         | <b>HC 25 de Setembro</b>                             | North: Nampula city          | Urban   | 5960                                         | 8                                        | December 4 2015          |

\* Data provided by the Ministry of Health.

## 2. Components of the ANC visits as per national guidelines

National guidelines from the Ministry in Health of Mozambique promote an ANC model including a series of evidence-based interventions for each ANC visit. Table S2 provides the interventions to be delivered to the women by ANC visit.

**Table S2: Elements/interventions in the ANC package of the Ministry of Health by ANC visit.**

| No. | Elements of ANC                                        | First ANC visit | Follow-up ANC visit*      |
|-----|--------------------------------------------------------|-----------------|---------------------------|
| 1   | Clinical physical examination                          | X               | X                         |
| 2   | Obstetric examination                                  | X               | X                         |
| 3   | Measurement of haemoglobin level                       | X               | From 32 weeks             |
| 4   | Assessing proteinuria                                  | X               | X                         |
| 5   | Measurement of blood pressure                          | X               | X                         |
| 6   | Performance of syphilis test and treatment             | X               |                           |
| 7   | Prevention of anaemia                                  |                 |                           |
|     | 7.1 Deworming (mebendazole)                            | X               |                           |
|     | 7.2 Ferrous sulfate + folic acid                       | X               | X                         |
| 8   | Malaria prevention                                     |                 |                           |
|     | 8.1 ITP (Sufadoxine-pyrimethamine)                     | X               | X                         |
|     | 8.2 Mosquito net                                       | X               |                           |
| 9   | HIV testing & counselling                              | X               | 3 months after first test |
| 10  | Vaccination                                            | X               | X                         |
| 11  | Complementary intervention: Provision of ARV treatment | X               | X                         |

\* Follow-up ANC visits are visits other than the first.

### 3. Components of Kit A and Kit B

**Table S3: Composition of Kit A**

|    | Product                                    | Pack size | Quantity of packs |
|----|--------------------------------------------|-----------|-------------------|
| 1  | Protein urine test strips                  | 100       | 1                 |
| 2  | HIV Rapid Diagnostic Test - Determine      | 100       | 1                 |
| 3  | HIV Rapid Diagnostic Test – Unigold        | 20        | 1                 |
| 4  | Syphilis Rapid Diagnostic Test             | 100       | 1                 |
| 5  | Haemoglobin test strips                    | 200       | 1                 |
| 6  | Ampoule of penicillin benzathine 2,4 MIU   | 50        | 1                 |
| 7  | Water for injection, 5ml ampoule           | 50        | 1                 |
| 8  | Syringe 5 ml with 21G needle               | 100       | 1                 |
| 9  | Mebendazole 500mg tablets                  | 100       | 1                 |
| 10 | Sufadoxine-pyrimethamine 500-25mg          | 150       | 2                 |
| 11 | Ferrous Sulphate/Folic Acid tablets (90/1) | 1000      | 3                 |
| 12 | Small tablet bags                          | 100       | 1                 |
| 13 | Latex examination gloves                   | 100       | 2                 |
| 14 | Disinfectant                               | 0.5 litre | 1                 |
| 15 | Cotton wool                                | 1 roll    | 1                 |
| 16 | Lancet                                     | 200       | 1                 |
| 17 | Chase buffers                              | 1         | 2                 |
| 18 | Capillary EDTA tubes                       | 1         | 3                 |

**Table S4: Composition of Kit B.**

|    | Product                                    | Pack size | Quantity of packs |
|----|--------------------------------------------|-----------|-------------------|
| 1  | Protein urine test strips                  | 100       | 2                 |
| 2  | HIV Rapid Diagnostic Test - Determine      | 100       | 1                 |
| 3  | HIV Rapid Diagnostic Test – Unigold        | 20        | 1                 |
| 4  | Sufadoxine-pyrimethamine 500-25mg tablets  | 150       | 4                 |
| 5  | Ferrous Sulphate/Folic Acid tablets (90/1) | 1000      | 6                 |
| 6  | Small tablet bags                          | 500       | 1                 |
| 7  | Haemoglobin test strips                    | 200       | 1                 |
| 8  | Latex examination gloves                   | 100       | 4                 |
| 9  | Disinfectant                               | 0,5 litre | 1                 |
| 10 | Cotton wool                                | 1 roll    | 1                 |
| 11 | Lancet                                     | 200       | 1                 |
| 12 | Chase buffers                              | 1         | 1                 |
| 13 | Capillary EDTA tubes                       | 1         | 2                 |

#### 4. Photos of the kits

Fig S1 and S2 present photos of Kit A; a ready-made box that is easily carried.

**Fig S1: Photo of an opened Kit A.**

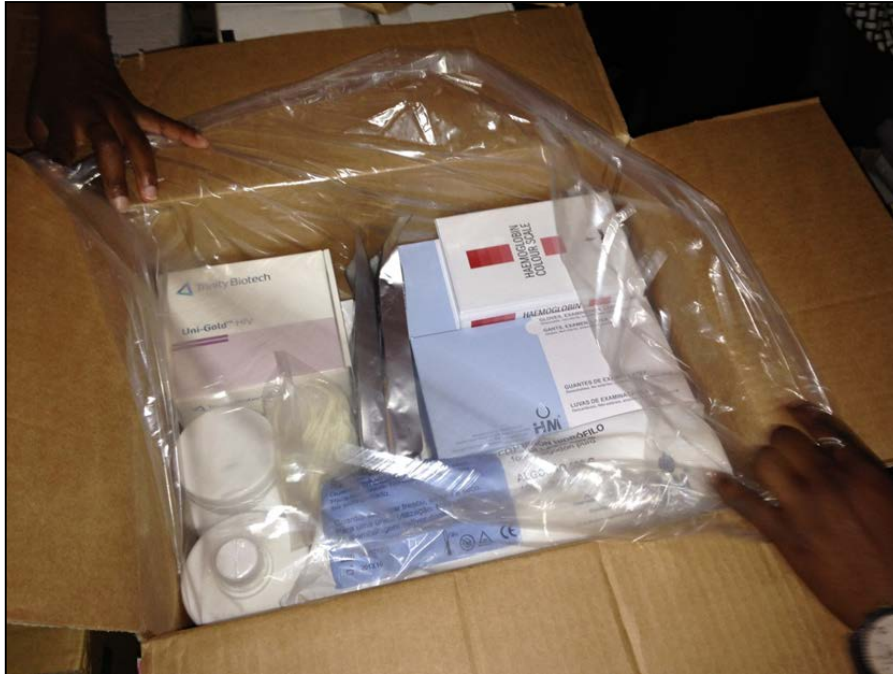

**Fig S2: Photo of the kits stacked.**

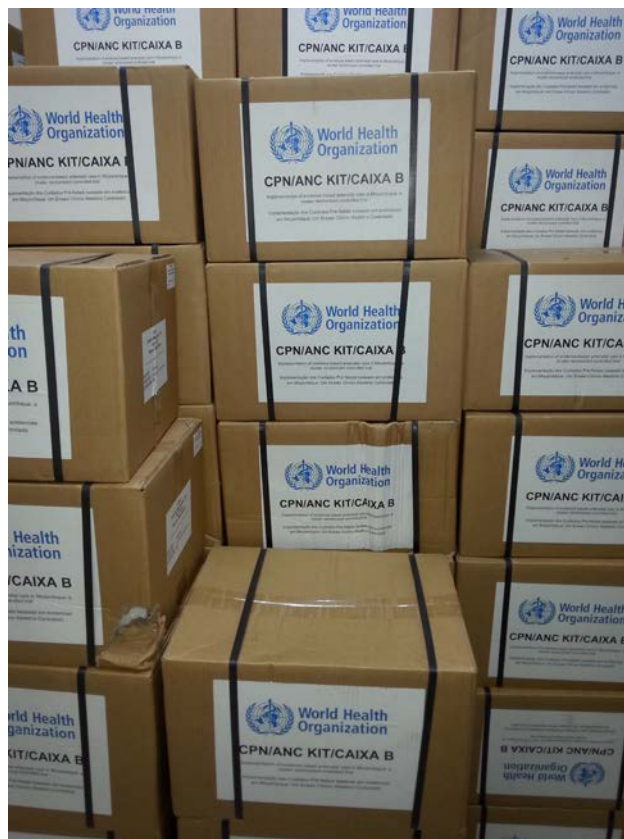

## 5. Detailed list of outcomes and definitions

For the purpose of the data analysis, the definitions of the outcomes had to be operationalized to be able to compute them from the data collected in the ANC logbook. For example, according to national guidelines for ANC, mebendazole should be given to women in the second or third trimester of pregnancy only. Under these guidelines, women were eligible to receive mebendazole if they had more than or equal to 12 weeks gestation and thus those at less than 12 weeks gestation were excluded from the denominator. Tables S5 and S6 list the outcomes and how they were defined and any other considerations for first and follow-up ANC visits, respectively. Section 12 of this Supplementary Appendix presents the logbook from where the data was extracted.

**Table S5: Primary and secondary outcomes in first ANC visits, definitions, considerations and variables used for their operationalization and calculation within the context of the ANC logbook in Section 12 of this Supplementary Appendix.**

| Outcome                                                             | Definition/considerations                                                                                                                                                                                                                                                                                                                                                                                                                                                                                                                                                                                                           | Eligible women (denominator)                                                                                  |
|---------------------------------------------------------------------|-------------------------------------------------------------------------------------------------------------------------------------------------------------------------------------------------------------------------------------------------------------------------------------------------------------------------------------------------------------------------------------------------------------------------------------------------------------------------------------------------------------------------------------------------------------------------------------------------------------------------------------|---------------------------------------------------------------------------------------------------------------|
| <b>Screening practices</b>                                          |                                                                                                                                                                                                                                                                                                                                                                                                                                                                                                                                                                                                                                     |                                                                                                               |
| Blood pressure measured in 1 <sup>st</sup> visit                    | <ul style="list-style-type: none"> <li>Proportion of eligible women who had blood pressure measured</li> <li>Sphygmomanometer provided as part of the intervention</li> </ul>                                                                                                                                                                                                                                                                                                                                                                                                                                                       | All women attending the 1 <sup>st</sup> ANC visit                                                             |
| Proteinuria assessed in 1 <sup>st</sup> visit                       | <ul style="list-style-type: none"> <li>Proportion of eligible women who had proteinuria assessed</li> <li>Dipsticks provided in the ANC kits</li> </ul>                                                                                                                                                                                                                                                                                                                                                                                                                                                                             | All women attending the 1 <sup>st</sup> ANC visit                                                             |
| Syphilis rapid test performed in 1 <sup>st</sup> visit              | <ul style="list-style-type: none"> <li>Proportion of eligible women who had a syphilis test performed</li> <li>Syphilis rapid test provided in the ANC kits</li> </ul>                                                                                                                                                                                                                                                                                                                                                                                                                                                              | All women attending the 1 <sup>st</sup> ANC visit                                                             |
| HIV test performed in 1 <sup>st</sup> visit                         | <ul style="list-style-type: none"> <li>Proportion of eligible women who had the HIV test performed</li> <li>HIV rapid tests provided in the ANC kits (Determine® and Unigold®)</li> </ul>                                                                                                                                                                                                                                                                                                                                                                                                                                           | All women whose HIV status in the 1st ANC visit was negative or unknown, and were not under treatment for HIV |
| Haemoglobin measured in 1 <sup>st</sup> visit                       | <ul style="list-style-type: none"> <li>Proportion of eligible women who had haemoglobin levels measured</li> <li>Haemoglobin colour scale tests provided in the ANC kits</li> </ul>                                                                                                                                                                                                                                                                                                                                                                                                                                                 | All women attending the 1 <sup>st</sup> ANC visit                                                             |
| <b>Treatment/prevention practices</b>                               |                                                                                                                                                                                                                                                                                                                                                                                                                                                                                                                                                                                                                                     |                                                                                                               |
| Penicillin received in 1 <sup>st</sup> visit (if syphilis positive) | <ul style="list-style-type: none"> <li>Proportion of eligible women who were given the 1<sup>st</sup> dose of penicillin</li> <li>Penicillin provided in the ANC kits</li> </ul>                                                                                                                                                                                                                                                                                                                                                                                                                                                    | All women who had a positive syphilis test in the 1 <sup>st</sup> ANC visit                                   |
| Antiretrovirals received in 1 <sup>st</sup> visit (if HIV positive) | <ul style="list-style-type: none"> <li>Proportion of eligible who were given antiretrovirals</li> <li>Antiretrovirals were not provided in the ANC kits but were part of the intervention</li> </ul>                                                                                                                                                                                                                                                                                                                                                                                                                                | All women who had a positive HIV test in the 1st ANC visit                                                    |
| Folic acid and ferrous sulfate received in 1 <sup>st</sup> visit    | <ul style="list-style-type: none"> <li>All pregnant women should receive 1 iron pill per day. In practice they are given 30 pills at each appointment and are told to come back after 30 days. The fact that they received the pills is recorded in their hand-held record (caderneta); only when they receive the 3rd dose of 30 pills, it is registered in the ANC book. Thus, the logbook does not provide the information required for the analysis since it registers only the women that have received the 3rd dose (which is never in the 1st ANC visit)</li> <li>Folic acid/ferrous sulphate provided in ANC kit</li> </ul> | No computed                                                                                                   |
| Mebendazole received in 1 <sup>st</sup> visit                       | <ul style="list-style-type: none"> <li>Proportion of eligible women who were given mebendazole</li> <li>According to the protocol of the MoH, mebendazole should only be given to women in the 2nd and 3rd trimester of pregnancy</li> <li>Mebendazole provided in ANC kit</li> </ul>                                                                                                                                                                                                                                                                                                                                               | All women at 13 weeks' or more gestation age, attending the 1st ANC visit                                     |

|                                                               |                                                                                                                                                                                                                                                                                                                                                                                                                                                                                                                                                                                                                                                                                                                                |                                                                                                                                   |
|---------------------------------------------------------------|--------------------------------------------------------------------------------------------------------------------------------------------------------------------------------------------------------------------------------------------------------------------------------------------------------------------------------------------------------------------------------------------------------------------------------------------------------------------------------------------------------------------------------------------------------------------------------------------------------------------------------------------------------------------------------------------------------------------------------|-----------------------------------------------------------------------------------------------------------------------------------|
| Sulphadoxine- pyrimethamine received in 1 <sup>st</sup> visit | <ul style="list-style-type: none"> <li>Proportion of eligible women who were given <i>fansidar</i></li> <li>According to the protocol of the MoH, <i>fansidar</i> should not be given early in pregnancy. At the beginning of the trial the norm was to start at 20 weeks. At some point during the trial this changed to 12 weeks. Conservatively, we used the 20 weeks as the cutoff throughout.</li> <li><i>Fansidar</i> should not be given to women who are HIV+ (if they are taking Cotrimoxazole and/or ART)</li> </ul>                                                                                                                                                                                                 | All women at 20 weeks' or more gestation age, who are not taking cotrimoxazol and/or ART, attending the 1 <sup>st</sup> ANC visit |
| Bed nets received in 1 <sup>st</sup> visit                    | <ul style="list-style-type: none"> <li>The bed nets were ANC Kit D so were part of the intervention but their supply was secured through other partners, and distribution by MoH</li> <li>The trial only strengthened this intervention by reminding nurses in the refresher training</li> <li>Major stock outs are rare but there were often short delays in distribution to health facilities. In these cases, nurses would give the woman her net on her follow-up visit.</li> </ul>                                                                                                                                                                                                                                        | Not computed                                                                                                                      |
| Tetanus toxoid received in 1 <sup>st</sup> visit              | <ul style="list-style-type: none"> <li>The vaccine was not provided in the ANC kits</li> <li>Stock outs are very rare in this item</li> <li>What the trial did was to remind nurses in refresher training that they should vaccinate women; and in one center a cool box was provided so that they could vaccinate in all ANC rooms without having to refer the woman to another room.</li> <li>Women that show they have been vaccinated previously (ie. By showing vaccination card or patient hand-held record (caderneta) should not be re-vaccinated. We would not expect 100% of women to receive the vaccine.</li> <li>Thus, the readings from the logbook are not adequate for the analysis of this outcome</li> </ul> | Not computed                                                                                                                      |

**Table S6: Secondary outcomes in follow-up ANC visits, definitions and consideration for operationalization within the context of the ANC logbook shown in Section 12 of this Supplementary Appendix.**

| Outcome                                                        | Definition/considerations                                                                                                                                                                            | Eligible women (denominator)                                                                                 |
|----------------------------------------------------------------|------------------------------------------------------------------------------------------------------------------------------------------------------------------------------------------------------|--------------------------------------------------------------------------------------------------------------|
| <b>Screening practices</b>                                     |                                                                                                                                                                                                      |                                                                                                              |
| Blood pressure measured in follow-up visits                    | <ul style="list-style-type: none"> <li>Proportion of eligible women who had blood pressure measured</li> <li>Sphygmomanometer provided as part of the intervention</li> </ul>                        | All women attending follow-up visits                                                                         |
| Proteinuria assessed in follow-up visits                       | <ul style="list-style-type: none"> <li>Proportion of eligible women who had proteinuria assessed</li> <li>Dipsticks provided in the ANC kits</li> </ul>                                              | All women attending follow-up visits                                                                         |
| Syphilis rapid test performed in follow-up visits              | <ul style="list-style-type: none"> <li>Not in follow-up visits according to national guidelines</li> </ul>                                                                                           | Not computed                                                                                                 |
| HIV test performed in follow-up visits                         | <ul style="list-style-type: none"> <li>Proportion of eligible women who had the HIV test performed</li> <li>HIV rapid tests provided in the ANC kits (Determine® and Unigold®)</li> </ul>            | All women whose HIV status in follow-up visits was negative or unknown, and were not under treatment for HIV |
| Haemoglobin measured in follow-up visits                       | <ul style="list-style-type: none"> <li>Proportion of eligible women who had haemoglobin levels measured</li> <li>Haemoglobin colour scale tests provided in the ANC kits</li> </ul>                  | All women attending follow-up visits                                                                         |
| <b>Treatment/prevention practices</b>                          |                                                                                                                                                                                                      |                                                                                                              |
| Penicillin received in follow-up visits (if syphilis positive) | <ul style="list-style-type: none"> <li>Not in follow-up visits according to national guidelines</li> </ul>                                                                                           | Not computed                                                                                                 |
| Antiretrovirals received in follow-up visits (if HIV positive) | <ul style="list-style-type: none"> <li>Proportion of eligible who were given antiretrovirals</li> <li>Antiretrovirals were not provided in the ANC kits but were part of the intervention</li> </ul> | All women who had a positive HIV test in follow-up visits                                                    |



|                                                             |                                                                                                                                                                                                                                                                                                                                                                                                                                                                                                                                                                                                                                                                                                                                |                                                                                                                      |
|-------------------------------------------------------------|--------------------------------------------------------------------------------------------------------------------------------------------------------------------------------------------------------------------------------------------------------------------------------------------------------------------------------------------------------------------------------------------------------------------------------------------------------------------------------------------------------------------------------------------------------------------------------------------------------------------------------------------------------------------------------------------------------------------------------|----------------------------------------------------------------------------------------------------------------------|
| Folic acid and ferrous sulfate received in follow-up visits | <ul style="list-style-type: none"> <li>All pregnant women should receive 1 iron pill per day. In practice they are given 30 pills at each appointment and are told to come back after 30 days. The fact that they received the pills is recorded in their hand-held record (caderneta); only when they receive the 3rd dose of 30 pills, it is registered in the ANC book. Thus, the logbook does not provide the information required for the analysis since it registers only the women that have received the 3rd dose (which is never in the 1st ANC visit)</li> <li>Folic acid/ferrous sulphate provided in ANC kit</li> </ul>                                                                                            | Not computed                                                                                                         |
| Mebendazole received in follow-up visits                    | <ul style="list-style-type: none"> <li>According to national guidelines, mebendazole is only given in the first ANC visit</li> </ul>                                                                                                                                                                                                                                                                                                                                                                                                                                                                                                                                                                                           | Not computed                                                                                                         |
| Sulphadoxine- pyrimethamine received in follow-up visits    | <ul style="list-style-type: none"> <li>Proportion of eligible women who were given <i>fansidar</i></li> <li>According to the protocol of the MoH, <i>fansidar</i> should not be given early in pregnancy. At the beginning of the trial the norm was to start at 20 weeks. At some point during the trial this changed to 12 weeks. Conservatively, we used the 20 weeks as the cutoff throughout.</li> <li><i>Fansidar</i> should not be given to women who are HIV+ (if they are taking Cotrimoxazole and/or ART)</li> </ul>                                                                                                                                                                                                 | All women at 20 weeks' or more gestation age, who are not taking cotrimoxazol and/or ART, attending follow-up visits |
| Bed nets received in follow-up visits                       | <ul style="list-style-type: none"> <li>The bed nets were ANC Kit D so were part of the intervention but their supply was secured through other partners, and distribution by MoH</li> <li>The trial only strengthened this intervention by reminding nurses in the refresher training</li> <li>Major stock outs are rare but there were often short delays in distribution to health facilities. In these cases, nurses would give the woman her net on her follow-up visit.</li> </ul>                                                                                                                                                                                                                                        | Not computed                                                                                                         |
| Tetanus toxoid received in follow-up visits                 | <ul style="list-style-type: none"> <li>The vaccine was not provided in the ANC kits</li> <li>Stock outs are very rare in this item</li> <li>What the trial did was to remind nurses in refresher training that they should vaccinate women; and in one center a cool box was provided so that they could vaccinate in all ANC rooms without having to refer the woman to another room.</li> <li>Women that show they have been vaccinated previously (ie. By showing vaccination card or patient hand-held record (caderneta) should not be re-vaccinated. We would not expect 100% of women to receive the vaccine.</li> <li>Thus, the readings from the logbook are not adequate for the analysis of this outcome</li> </ul> | Not computed                                                                                                         |

## 6. Practice delivery rates at baseline (Step 1)

Table S7. Practice delivery rates among first visits in step one, which was used to define the primary outcomes of the trial.

|                                   | n/N       | Rate |
|-----------------------------------|-----------|------|
| Screening for anaemia             | 1007/7792 | 12.9 |
| Screening for proteinuria         | 951/7792  | 12.2 |
| Treatment for worms (mebendazole) | 2137/7225 | 30.1 |
| Screening for high blood pressure | 5457/7792 | 70.0 |
| Preventive treatment for malaria  | 2089/3935 | 53.1 |
| Screening for HIV                 | 6836/7274 | 94.0 |
| Treatment for HIV                 | 562/638   | 88.1 |
| Screening for syphilis            | 3260/7792 | 41.8 |
| Treatment for syphilis            | 56/145    | 38.6 |

## 7. Data management and data quality assurance

This was a pragmatic trial which used routine data as its primary data source. ANC nurses in Mozambique are required to register all antenatal visits in standardized logbooks which are designed and provided by the MOH. While the MOH compiles data from monthly summaries generated by the nurses on the basis of the data in the logbooks, there is no system in place to systematically digitalize this information. Women have a hand-held record (caderneta) where the healthcare provider writes the information related to pregnancy. Women do not have clinical records, and the logbook was the only source document for the trial. Data management procedures were developed and implemented in all 10 participating ANC clinics with the purpose of transferring the data in the logbook to the data management center. A simple coding system was introduced for the logbooks in order to avoid the ambiguities present in the standard system for completing the logbooks, and nurses were trained in how to complete the logbooks correctly using the coding system. Research assistants hired for the trial regularly reviewed the logbooks in each ANC clinic, took digital photos of each page of the logbook and sent them to the data management center in Maputo. We originally intended to link first and follow-up ANC visits for each woman by assigning a unique study subject ID at enrolment; however, implementation of such a system was in practice challenging and it is only available for a subset of the data.

Several data quality audit and monitoring activities were implemented. Special consideration was taken to avoid bias due to changes in data quality associated with the implementation of the intervention. With this aim and to the extent possible, procedures and monitoring for data collection were deployed independently from the deployment and monitoring of the intervention.

In order to minimize potential issues with quality of the routine data collected from the logbooks, three independent data monitoring procedures were implemented. First, we conducted routine monitoring visits to verify that the trial data collection instrument –the registration logbook– was being completed appropriately and that the data management processes were being done according to standardized procedures. These visits were conducted every two to three months in both control and intervention sites. Second, once in each ANC clinic, data monitors directly observed 100 consecutive first ANC visits per facility, and registered the results of tests and procedures in a monitoring log. The data in this monitoring log was then compared to the same records in the logbooks completed by the nurses. Third, a set of surveys was conducted by interviewing a sample of 100 consecutive women at each ANC clinic as they were leaving their first ANC visit. To compare data quality between the intervention and control periods, these data surveys were conducted at three different times – at the start, middle and end of the data collection period.

Data management followed Good Clinical Practice (GCP) guidelines, and was implemented according to pre-defined HRP/WHO Standardized Operating Procedures (SOPs) for managing clinical trials. A more detailed description of these procedures can be found in the study protocol <sup>11</sup>.

## 8. Diagram of first and follow-up ANC visits independently

**Table S8: Trial diagram for first ANC visits.** Each step equals 2 months except for step 1 which was 3 months. The ANC clinics are listed in Table S1 of this Supplementary Appendix.

| Clinics      | Steps |      |      |      |      |      |      |      |      |      |      | Total |
|--------------|-------|------|------|------|------|------|------|------|------|------|------|-------|
|              | 1     | 2    | 3    | 4    | 5    | 6    | 7    | 8    | 9    | 10   | 11   |       |
| 1            | 801   | 615  | 490  | 617  | 624  | 719  | 562  | 593  | 447  | 515  | 733  | 6716  |
| 2            | 998   | 613  | 703  | 836  | 879  | 769  | 728  | 644  | 717  | 934  | 906  | 8727  |
| 3            | 275   | 184  | 164  | 195  | 210  | 208  | 183  | 168  | 162  | 193  | 185  | 2127  |
| 4            | 1071  | 618  | 708  | 834  | 486  | 633  | 631  | 686  | 529  | 451  | 546  | 7193  |
| 5            | 793   | 441  | 283  | 603  | 566  | 182  | 698  | 678  | 755  | 831  | 761  | 6591  |
| 6            | 615   | 333  | 330  | 448  | 391  | 358  | 357  | 324  | 362  | 394  | 418  | 4330  |
| 7            | 412   | 305  | 370  | 392  | 377  | 408  | 470  | 414  | 349  | 392  | 389  | 4278  |
| 8            | 1285  | 979  | 962  | 905  | 950  | 1107 | 979  | 938  | 759  | 927  | 1055 | 10846 |
| 9            | 710   | 501  | 340  | 458  | 475  | 423  | 513  | 425  | 415  | 449  | 432  | 5141  |
| 10           | 832   | 946  | 911  | 1008 | 1381 | 1448 | 1124 | 1149 | 1209 | 1292 | 1349 | 12649 |
| <b>Total</b> | 7792  | 5535 | 5261 | 6296 | 6339 | 6255 | 6245 | 6019 | 5704 | 6378 | 6774 | 68598 |

Control Study Period
  Intervention Study Period

**Table S9: Trial diagram for follow-up visits.** Each step equals 2 months except for step 1 which was 3 months. The ANC clinics are listed in Table S1 of this Supplementary Appendix.

| Clinics      | Steps |       |       |       |       |       |       |       |       |       |       | Total  |
|--------------|-------|-------|-------|-------|-------|-------|-------|-------|-------|-------|-------|--------|
|              | 1     | 2     | 3     | 4     | 5     | 6     | 7     | 8     | 9     | 10    | 11    |        |
| 1            | 1085  | 665   | 551   | 632   | 584   | 617   | 661   | 588   | 498   | 664   | 607   | 7152   |
| 2            | 2655  | 1537  | 1547  | 1668  | 1967  | 1932  | 1876  | 1746  | 1487  | 1646  | 1498  | 19559  |
| 3            | 1085  | 585   | 666   | 469   | 589   | 722   | 689   | 635   | 603   | 538   | 583   | 7164   |
| 4            | 2067  | 1445  | 1347  | 1025  | 1197  | 1428  | 1596  | 1706  | 1359  | 1166  | 1295  | 15631  |
| 5            | 1982  | 1487  | 685   | 1655  | 1504  | 1833  | 1784  | 1688  | 1459  | 1203  | 1463  | 16743  |
| 6            | 1909  | 1291  | 1115  | 1154  | 1412  | 1414  | 1306  | 1271  | 1142  | 1175  | 1195  | 14384  |
| 7            | 1104  | 988   | 951   | 918   | 1005  | 1068  | 936   | 929   | 916   | 965   | 989   | 10769  |
| 8            | 2226  | 1328  | 836   | 1274  | 1509  | 1586  | 1639  | 1655  | 1588  | 1293  | 1220  | 16154  |
| 9            | 2267  | 1315  | 1483  | 1071  | 1216  | 1305  | 1471  | 1581  | 1480  | 1086  | 1279  | 15554  |
| 10           | 2316  | 2688  | 1658  | 1722  | 2257  | 2204  | 2850  | 2834  | 2563  | 2649  | 2828  | 26569  |
| <b>Total</b> | 18696 | 13329 | 10839 | 11588 | 13240 | 14109 | 14808 | 14633 | 13095 | 12385 | 12957 | 149679 |

Control Study Period
  Intervention Study Period

## 9. Effect of the intervention in follow-up antenatal care visits

We originally intended to link first and follow-up ANC visits for each woman by assigning a unique study subject ID at enrolment; however, implementation of such a system was in practice challenging and it is only available for a subset of the data. In the analysis of follow-up ANC visits, women may contribute with more than one visit (i.e. repeated visits), and as such these observations are not independent. Since we were only able to identify repeated visits in a subset of women by using the unique subject ID, the main analysis was conducted without adjusting for repeating visits. However, a sensitivity analysis was conducted in this subset of women, including subject ID in the regression models as a random variable to assess the impact of the lack of independence of multiple observation on inference estimates. The impact of these adjustments on the precision of the estimates was very small. These analyses were computed by fitting generalized linear mixed models with the lme4 statistical package in R (version 3.1).

Table S11 shows the effect of the intervention in secondary outcomes in follow-up visits. A statistically and clinically significant increase in practice coverage was observed in four of the six secondary outcomes evaluated in follow-up visits. Table S11 shows that 4015 of 85058 women (4.7%) were screened for anemia in the control period, as compared to 48319 of 64621 women (74.8%) in the intervention period (adjusted odds ratio, 140.97; 99% CI, 123.60 to 160.79;  $P < 0.001$ ). For proteinuria, 2804 of 85058 women (3.3%) were screened for proteinuria in the control period, as compared to 59517 of 64621 women (92.1%) in the intervention period (adjusted odds ratio, 160.20; 99% CI, 136.37 to 188.19;  $P < 0.001$ ). For blood pressure, 57697 of 85058 women (67.8%) had their blood pressure measured in the control period, as compared to 64001 of 64621 women (99.0%) in the intervention period (adjusted odds ratio, 475.61; 99% CI, 398.70 to 567.35;  $P < 0.001$ ). Preventive treatment for malaria (IPT) was provided to 35254 of 68045 women (51.8%) in the control period, as compared with 33610 of 52141 women (64.5%) in the intervention period (adjusted odds ratio, 1.37; 99% CI, 1.30 to 1.45;  $P < 0.001$ ).

For HIV practices in follow-up visits, the intervention did not have an effect. Table S11 shows that 522 of 75017 women (0.7%) was screened for HIV in the control period, as compared to 349 of 58009 women (0.6%) in the intervention period (adjusted odds ratio, 1.24; 99% CI, 0.90 to 1.70;  $P = 0.005$ ). Lastly, 30 of 54 HIV-positive women (55.6%) was treated with ARV in the control period, as compared to 15 of 25 women (60%) in the intervention period (adjusted odds ratio, 1.36; 99% CI, 0.25 to 7.34;  $P = 0.068$ ).

The overall pattern of improvement is less dramatic in follow-up visit than in first visits. This is thought to be due to less clear national guidelines and protocols referring to follow-up visits. HIV repeat screening is only tested in some cases and HIV treatment continues at each visit.

**Table S10. Effect of the intervention during follow-up antenatal care visits.**

|                                   | Control period |      | Intervention period |      | Mixed Model Adjusted Odds Ratio<br>of Intervention Effect (99% CI) ‡ |        |        | P Value | ICC § |
|-----------------------------------|----------------|------|---------------------|------|----------------------------------------------------------------------|--------|--------|---------|-------|
|                                   | n/N            | Rate | n/N                 | Rate |                                                                      |        |        |         |       |
| Screening for anaemia             | 4015/85058     | 4.7  | 48319/64621         | 74.8 | 140.97                                                               | 123.60 | 160.79 | 0.0000  | 0.316 |
| Screening for proteinuria         | 2804/85058     | 3.3  | 59517/64621         | 92.1 | 160.20                                                               | 136.37 | 188.19 | 0.0000  | 0.210 |
| Screening for high blood pressure | 57697/85058    | 67.8 | 64001/64621         | 99.0 | 475.61                                                               | 398.70 | 567.35 | 0.0000  | 0.540 |
| Preventive treatment for malaria  | 35254/68045    | 51.8 | 33610/52141         | 64.5 | 1.37                                                                 | 1.30   | 1.45   | 0.0000  | 0.059 |
| Screening for HIV                 | 522/75017      | 0.7  | 349/58009           | 0.6  | 1.24                                                                 | 0.90   | 1.70   | 0.0851  | 0.005 |
| Treatment for HIV                 | 30/54          | 55.6 | 15/25               | 60.0 | 1.36                                                                 | 0.25   | 7.34   | 0.6412  | 0.068 |

‡ Mixed model odds ratios account for the clustering of patients within clinics and adjust for time trends. Under the stepped-wedge design, the adjusted odds ratios are calculated with the use of all data points in the intervention period versus the control period and so represent the average odds of exposure to the intervention.

§ Intraclass correlation coefficient during the control period

**Figure S3. Outcome rates, by step and ANC clinic; follow-up ANC visits.** Each cell contains the proportion of women who received each specific practice in the corresponding ANC clinic and step.

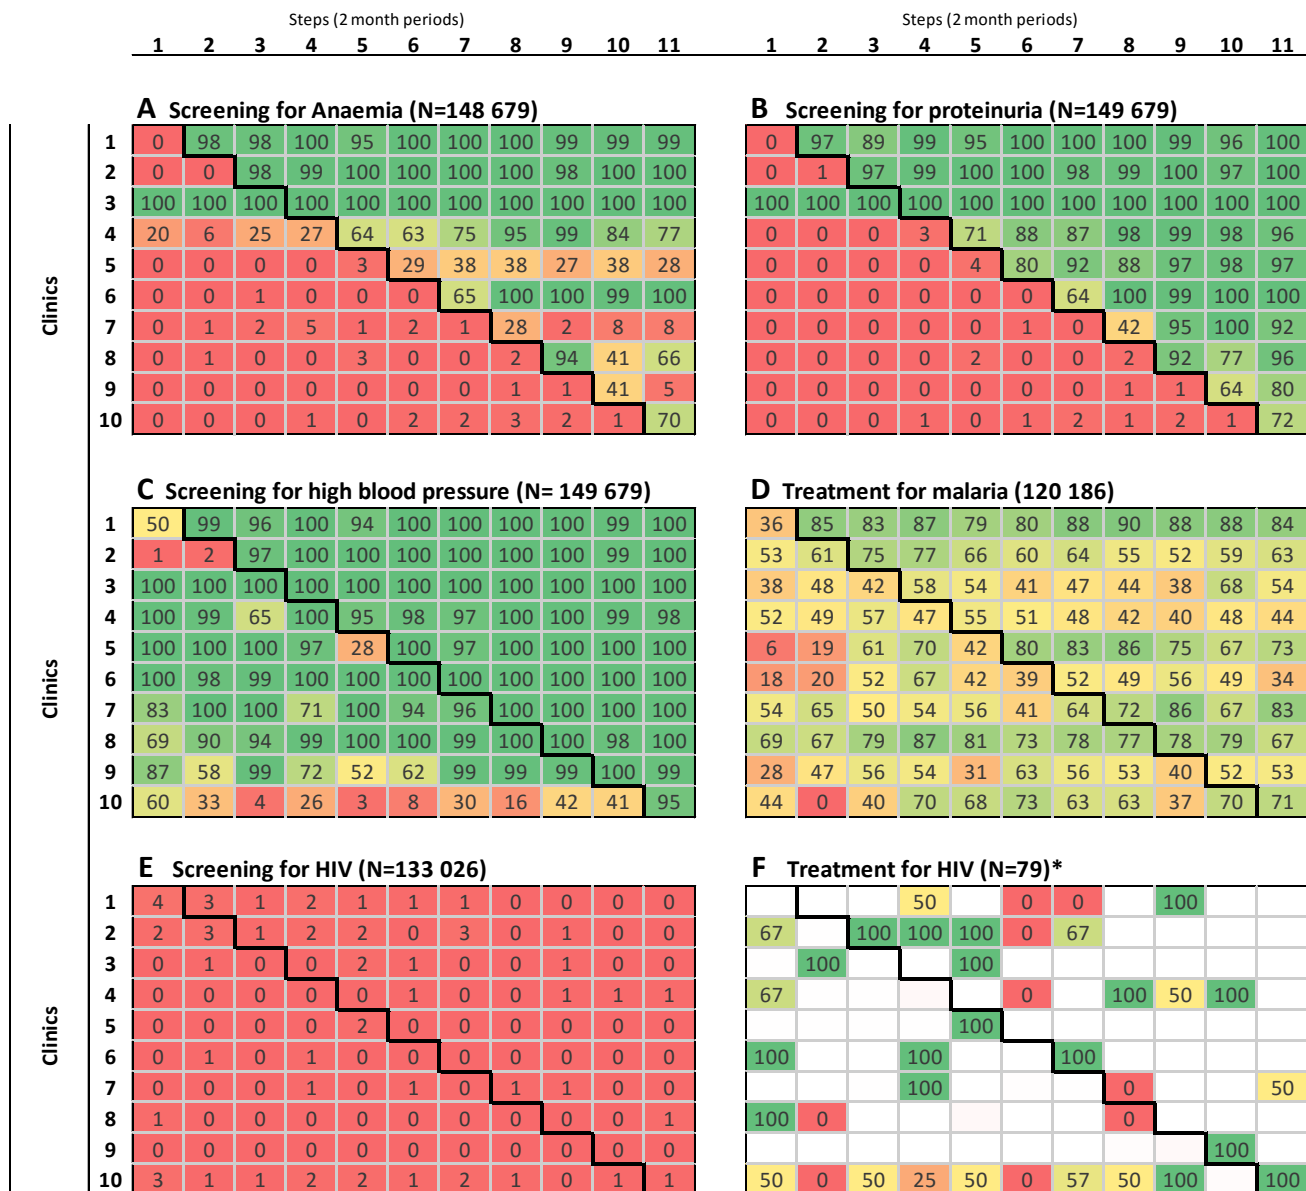

\*When the denominator to compute the cell rate is 0, cells are coloured in white.

## 10. Effect of the intervention in composite outcome

We computed this score for first ANC visits and included practices targeting all or most women as opposed to practices that are intended for a small subgroup such as treatment for syphilis or HIV. To compute this score, one point was added for each intended screening or treatment intervention delivered during the ANC visits. The practices included in the score were screening for high blood pressure, proteinuria, anaemia, syphilis and HIV, and treatment for parasitic worms. These add up to a maximum score value of six points.

The intervention was also found to have a statistically significant effect on the composite outcome score (adjusted mean difference 1.72; 99% CI 1.70–1.74;  $p < 0.0001$ ).

Figure S4. Composite outcome score, by step and ANC clinic; first ANC visits.

| Clinics | Steps |     |     |     |     |     |     |     |     |     |     |
|---------|-------|-----|-----|-----|-----|-----|-----|-----|-----|-----|-----|
|         | 1     | 2   | 3   | 4   | 5   | 6   | 7   | 8   | 9   | 10  | 11  |
| 1       | 2.4   | 5.7 | 5.7 | 5.9 | 5.8 | 5.9 | 5.9 | 5.9 | 5.9 | 5.8 | 5.9 |
| 2       | 1.6   | 2.3 | 5.7 | 5.7 | 5.4 | 5.6 | 5.7 | 5.8 | 5.6 | 5.7 | 5.7 |
| 3       | 5.2   | 5.6 | 5.7 | 5.2 | 5.5 | 5.3 | 5.4 | 5.6 | 5.6 | 5.5 | 5.6 |
| 4       | 2.7   | 3.0 | 2.8 | 3.1 | 5.6 | 5.4 | 5.4 | 5.5 | 5.5 | 5.5 | 5.6 |
| 5       | 4.4   | 4.1 | 5.1 | 5.3 | 4.7 | 5.8 | 5.7 | 5.6 | 5.6 | 5.6 | 5.7 |
| 6       | 2.4   | 2.7 | 3.5 | 3.4 | 3.6 | 3.7 | 4.9 | 5.5 | 5.6 | 5.5 | 5.6 |
| 7       | 1.8   | 3.1 | 3.5 | 3.1 | 3.5 | 3.7 | 3.3 | 5.5 | 5.7 | 5.6 | 5.6 |
| 8       | 2.4   | 2.5 | 2.6 | 3.2 | 3.0 | 2.7 | 2.6 | 3.0 | 5.3 | 5.6 | 5.7 |
| 9       | 2.2   | 4.1 | 4.8 | 4.6 | 4.0 | 3.6 | 3.7 | 3.5 | 3.8 | 5.7 | 5.7 |
| 10      | 1.8   | 2.1 | 2.1 | 2.7 | 2.3 | 2.6 | 2.7 | 2.4 | 2.1 | 2.2 | 4.9 |

## 11. Ethical aspects of the trial

This protocol has been approved by the *Comité Nacional de Bioética para a Saúde* of the Ministry of Health in Mozambique. In addition, it has been approved by the Research Project Review Panel of the UNDP/UNFPA/UNICEF/WHO/World Bank Special Programme of Research, Development and Research Training in Human Reproduction at the Department of Reproductive Health and Research of WHO, and the WHO Research Ethics Review Committee, Geneva, Switzerland.

A waiver of consent forms for participating women was obtained since this study is considered of minimal risk (risks of daily life, and includes the risks associated with routine physical examinations and review of medical records) and it is developed in the context of regular prenatal care and using as research records those used in health care process (no data collection tools have been developed to gather data regarding women's health for the study). Recommendations provided for The Ottawa Statement on the Ethical Design and Conduct of Cluster Randomized Trials were taken into account in the design of this trial.

## 12. Checklist of items to be included when reporting a cluster randomized controlled trial

| Section/Topic                           | Item No | Standard Checklist item                                                                                                                                                                     | Extension for cluster designs                                                                                                                                                                                      | Page No.                         |
|-----------------------------------------|---------|---------------------------------------------------------------------------------------------------------------------------------------------------------------------------------------------|--------------------------------------------------------------------------------------------------------------------------------------------------------------------------------------------------------------------|----------------------------------|
| <b>Title and abstract</b>               |         |                                                                                                                                                                                             |                                                                                                                                                                                                                    |                                  |
|                                         | 1a      | Identification as a randomised trial in the title                                                                                                                                           | Identification as a cluster randomised trial in the title                                                                                                                                                          | 1                                |
|                                         | 1b      | Structured summary of trial design, methods, results, and conclusions (for specific guidance see CONSORT for abstracts)                                                                     |                                                                                                                                                                                                                    | 5                                |
| <b>Introduction</b>                     |         |                                                                                                                                                                                             |                                                                                                                                                                                                                    |                                  |
| <b>Background and objectives</b>        | 2a      | Scientific background and explanation of rationale                                                                                                                                          | Rationale for using a cluster design                                                                                                                                                                               | 8-9                              |
|                                         | 2b      | Specific objectives or hypotheses                                                                                                                                                           | Whether objectives pertain to the cluster level, the individual participant level or both                                                                                                                          | 8-9                              |
| <b>Methods</b>                          |         |                                                                                                                                                                                             |                                                                                                                                                                                                                    |                                  |
| <b>Trial design</b>                     | 3a      | Description of trial design (such as parallel, factorial) including allocation ratio                                                                                                        | Definition of cluster and description of how the design features apply to the clusters                                                                                                                             | 8-9                              |
|                                         | 3b      | Important changes to methods after trial commencement (such as eligibility criteria), with reasons                                                                                          |                                                                                                                                                                                                                    | -                                |
| <b>Participants</b>                     | 4a      | Eligibility criteria for participants                                                                                                                                                       | Eligibility criteria for clusters                                                                                                                                                                                  | 8-9                              |
|                                         | 4b      | Settings and locations where the data were collected                                                                                                                                        |                                                                                                                                                                                                                    | 8-9<br>Suppl. Appendix Section 1 |
| <b>Interventions</b>                    | 5       | The interventions for each group with sufficient details to allow replication, including how and when they were actually administered                                                       | Whether interventions pertain to the cluster level, the individual participant level or both                                                                                                                       | 9                                |
| <b>Outcomes</b>                         | 6a      | Completely defined pre-specified primary and secondary outcome measures, including how and when they were assessed                                                                          | Whether outcome measures pertain to the cluster level, the individual participant level or both                                                                                                                    | 11                               |
|                                         | 6b      | Any changes to trial outcomes after the trial commenced, with reasons                                                                                                                       |                                                                                                                                                                                                                    | 11                               |
| <b>Sample size</b>                      | 7a      | How sample size was determined                                                                                                                                                              | Method of calculation, number of clusters(s) (and whether equal or unequal cluster sizes are assumed), cluster size, a coefficient of intracluster correlation (ICC or $k$ ), and an indication of its uncertainty | 12-13                            |
|                                         | 7b      | When applicable, explanation of any interim analyses and stopping guidelines                                                                                                                |                                                                                                                                                                                                                    | 12-13                            |
| <b>Randomisation:</b>                   |         |                                                                                                                                                                                             |                                                                                                                                                                                                                    |                                  |
| <b>Sequence generation</b>              | 8a      | Method used to generate the random allocation sequence                                                                                                                                      |                                                                                                                                                                                                                    | 12                               |
|                                         | 8b      | Type of randomisation; details of any restriction (such as blocking and block size)                                                                                                         | Details of stratification or matching if used                                                                                                                                                                      | -                                |
| <b>Allocation concealment mechanism</b> | 9       | Mechanism used to implement the random allocation sequence (such as sequentially numbered containers), describing any steps taken to conceal the sequence until interventions were assigned | Specification that allocation was based on clusters rather than individuals and whether allocation concealment (if any) was at the cluster level, the individual participant level or both                         | 11                               |
| <b>Implementation</b>                   | 10      | Who generated the random allocation sequence, who enrolled participants, and who assigned participants to interventions                                                                     | Replace by 10a, 10b and 10c                                                                                                                                                                                        |                                  |
|                                         | 10a     |                                                                                                                                                                                             | Who generated the random allocation sequence, who enrolled clusters, and who assigned clusters to interventions                                                                                                    | 8-9, 12                          |
|                                         | 10b     |                                                                                                                                                                                             | Mechanism by which individual participants were included in clusters for the purposes of the trial (such as complete enumeration, random sampling)                                                                 | 8-9                              |
|                                         | 10c     |                                                                                                                                                                                             | From whom consent was sought (representatives of the cluster, or individual                                                                                                                                        | Suppl. Appendix Section 11       |

|                                                             |     |                                                                                                                                                   |                                                                                                                                                          |
|-------------------------------------------------------------|-----|---------------------------------------------------------------------------------------------------------------------------------------------------|----------------------------------------------------------------------------------------------------------------------------------------------------------|
|                                                             |     | cluster members, or both), and whether consent was sought before or after randomisation                                                           |                                                                                                                                                          |
| <b>Blinding</b>                                             | 11a | If done, who was blinded after assignment to interventions (for example, participants, care providers, those assessing outcomes) and how          | -                                                                                                                                                        |
|                                                             | 11b | If relevant, description of the similarity of interventions                                                                                       | 10-11                                                                                                                                                    |
| <b>Statistical methods</b>                                  | 12a | Statistical methods used to compare groups for primary and secondary outcomes                                                                     | How clustering was taken into account<br>12-13                                                                                                           |
|                                                             | 12b | Methods for additional analyses, such as subgroup analyses and adjusted analyses                                                                  | 12-13                                                                                                                                                    |
| <b>Results</b>                                              |     |                                                                                                                                                   |                                                                                                                                                          |
| <b>Participant flow (a diagram is strongly recommended)</b> | 13a | For each group, the numbers of participants who were randomly assigned, received intended treatment, and were analysed for the primary outcome    | For each group, the numbers of clusters that were randomly assigned, received intended treatment, and were analysed for the primary outcome<br>13        |
|                                                             | 13b | For each group, losses and exclusions after randomisation, together with reasons                                                                  | For each group, losses and exclusions for both clusters and individual cluster members<br>13-14                                                          |
| <b>Recruitment</b>                                          | 14a | Dates defining the periods of recruitment and follow-up                                                                                           | 13 and Suppl. Appendix Section 1                                                                                                                         |
|                                                             | 14b | Why the trial ended or was stopped                                                                                                                | -                                                                                                                                                        |
| <b>Baseline data</b>                                        | 15  | A table showing baseline demographic and clinical characteristics for each group                                                                  | Baseline characteristics for the individual and cluster levels as applicable for each group<br>Table 3                                                   |
| <b>Numbers analysed</b>                                     | 16  | For each group, number of participants (denominator) included in each analysis and whether the analysis was by original assigned groups           | For each group, number of clusters included in each analysis<br>13-14                                                                                    |
| <b>Outcomes and estimation</b>                              | 17a | For each primary and secondary outcome, results for each group, and the estimated effect size and its precision (such as 95% confidence interval) | Results at the individual or cluster level as applicable and a coefficient of intracluster correlation (ICC or $k$ ) for each primary outcome<br>Table 4 |
|                                                             | 17b | For binary outcomes, presentation of both absolute and relative effect sizes is recommended                                                       | Table 4                                                                                                                                                  |
| <b>Ancillary analyses</b>                                   | 18  | Results of any other analyses performed, including subgroup analyses and adjusted analyses, distinguishing pre-specified from exploratory         | Table 4 and Suppl. Appendix Sections 9 and 10                                                                                                            |
| <b>Harms</b>                                                | 19  | All important harms or unintended effects in each group (for specific guidance see CONSORT for harms <sup>i</sup> )                               | -                                                                                                                                                        |
| <b>Discussion</b>                                           |     |                                                                                                                                                   |                                                                                                                                                          |
| <b>Limitations</b>                                          | 20  | Trial limitations, addressing sources of potential bias, imprecision, and, if relevant, multiplicity of analyses                                  | 17                                                                                                                                                       |
| <b>Generalisability</b>                                     | 21  | Generalisability (external validity, applicability) of the trial findings                                                                         | Generalisability to clusters and/or individual participants (as relevant)<br>18                                                                          |
| <b>Interpretation</b>                                       | 22  | Interpretation consistent with results, balancing benefits and harms, and considering other relevant evidence                                     | 18                                                                                                                                                       |
| <b>Other information</b>                                    |     |                                                                                                                                                   |                                                                                                                                                          |
| <b>Registration</b>                                         | 23  | Registration number and name of trial registry                                                                                                    | 6                                                                                                                                                        |
| <b>Protocol</b>                                             | 24  | Where the full trial protocol can be accessed, if available                                                                                       | 7-8 and reference 14                                                                                                                                     |
| <b>Funding</b>                                              | 25  | Sources of funding and other support (such as supply of drugs), role of funders                                                                   | 6                                                                                                                                                        |



13. Data collection instrument: ANC logbook

Fig S5: Page 1 (left page) of the Mozambique national ANC logbook (each row represent one ANC visit).

Livro de Registos da Consulta Pré-Natal - MOD SIS-B01

Ano \_\_\_\_\_

| Nº de ordem mensal | Data da CPN (D/M) | Nome da utente | Idade | Tipo de CPN (marque com X o que se aplicar) |          |            | IG em semanas | Tensão arterial ≥ 140/90 mmHg |     | Desnutrição        |                           | PB entre 19-22 cm na CPN seguintes | Hemoglobina <8mg/dl |     | Proteinúria |     | Úlcera genital (marque X) | Leucorreia (marque X) | Despiste e tratamento de sífilis e outras ITS                                                         |                                                                  |         |         |          |         |           |         |         | Exame da mama (presença de nódulos) | VAT (marque com X apenas um) |                                    |                       | Prevenção da anemia |          | Seroestado HIV na 1ª CPN (marque com X apenas um) |                       |    |  |  |  |  |  |
|--------------------|-------------------|----------------|-------|---------------------------------------------|----------|------------|---------------|-------------------------------|-----|--------------------|---------------------------|------------------------------------|---------------------|-----|-------------|-----|---------------------------|-----------------------|-------------------------------------------------------------------------------------------------------|------------------------------------------------------------------|---------|---------|----------|---------|-----------|---------|---------|-------------------------------------|------------------------------|------------------------------------|-----------------------|---------------------|----------|---------------------------------------------------|-----------------------|----|--|--|--|--|--|
|                    |                   |                |       | Primeira                                    | Seguinte | Quarta CPN |               | Sim                           | Não | < 16 kg/m2 (grave) | 16-18,5 kg/m 2 (moderada) |                                    | Sim                 | Não | Sim         | Não |                           |                       | Teste de sífilis (marque com círculo na data do diagnóstico) - Positivo(P); Negativo(N); Não Fez (NF) | Tratamento da sífilis na grávida (marque com X apenas uma opção) |         |         | Parceiro |         |           | 1ª dose | 2ª dose |                                     | Dose de reforço              | recebe sal ferroso c/ ácido fólico | Recebe desparasitante | Desconhecido        | Negativo | Positivo                                          | Se positivo, em TARV? |    |  |  |  |  |  |
|                    |                   |                |       |                                             |          |            |               |                               |     |                    |                           |                                    |                     |     |             |     |                           |                       |                                                                                                       | 1ª dose                                                          | 2ª dose | 3ª dose | 1ª dose  | 2ª dose | 3ª dose   |         |         |                                     |                              |                                    |                       |                     |          |                                                   |                       |    |  |  |  |  |  |
| 1                  | 2                 | 3              | 4     | 5                                           | 6        | 7          | 8             | 9                             | 10  | 11                 | 12                        | 13                                 | 14                  | 15  | 16          | 17  | 18                        | 19                    | 20                                                                                                    | 21                                                               | 22      | 23      | 24       | 25      | 26        | 27      | 28      | 29                                  | 30                           | 31                                 | 32                    | 33                  | 34       | 35                                                | 36                    | 37 |  |  |  |  |  |
| 1                  |                   |                |       |                                             |          |            |               |                               |     |                    |                           |                                    |                     |     |             |     |                           |                       | P                                                                                                     | N                                                                | Nf      |         |          |         | P         | N       | Nf      |                                     |                              |                                    |                       |                     |          |                                                   |                       |    |  |  |  |  |  |
| 2                  |                   |                |       |                                             |          |            |               |                               |     |                    |                           |                                    |                     |     |             |     |                           |                       |                                                                                                       | P                                                                | N       | Nf      |          |         |           | P       | N       | Nf                                  |                              |                                    |                       |                     |          |                                                   |                       |    |  |  |  |  |  |
| 3                  |                   |                |       |                                             |          |            |               |                               |     |                    |                           |                                    |                     |     |             |     |                           |                       |                                                                                                       | P                                                                | N       | Nf      |          |         |           | P       | N       | Nf                                  |                              |                                    |                       |                     |          |                                                   |                       |    |  |  |  |  |  |
| 4                  |                   |                |       |                                             |          |            |               |                               |     |                    |                           |                                    |                     |     |             |     |                           |                       |                                                                                                       | P                                                                | N       | Nf      |          |         |           | P       | N       | Nf                                  |                              |                                    |                       |                     |          |                                                   |                       |    |  |  |  |  |  |
| 5                  |                   |                |       |                                             |          |            |               |                               |     |                    |                           |                                    |                     |     |             |     |                           |                       |                                                                                                       | P                                                                | N       | Nf      |          |         |           | P       | N       | Nf                                  |                              |                                    |                       |                     |          |                                                   |                       |    |  |  |  |  |  |
| 6                  |                   |                |       |                                             |          |            |               |                               |     |                    |                           |                                    |                     |     |             |     |                           |                       |                                                                                                       | P                                                                | N       | Nf      |          |         |           | P       | N       | Nf                                  |                              |                                    |                       |                     |          |                                                   |                       |    |  |  |  |  |  |
| 7                  |                   |                |       |                                             |          |            |               |                               |     |                    |                           |                                    |                     |     |             |     |                           |                       |                                                                                                       | P                                                                | N       | Nf      |          |         |           | P       | N       | Nf                                  |                              |                                    |                       |                     |          |                                                   |                       |    |  |  |  |  |  |
| 8                  |                   |                |       |                                             |          |            |               |                               |     |                    |                           |                                    |                     |     |             |     |                           |                       |                                                                                                       | P                                                                | N       | Nf      |          |         |           | P       | N       | Nf                                  |                              |                                    |                       |                     |          |                                                   |                       |    |  |  |  |  |  |
| 9                  |                   |                |       |                                             |          |            |               |                               |     |                    |                           |                                    |                     |     |             |     |                           |                       |                                                                                                       | P                                                                | N       | Nf      |          |         |           | P       | N       | Nf                                  |                              |                                    |                       |                     |          |                                                   |                       |    |  |  |  |  |  |
| 10                 |                   |                |       |                                             |          |            |               |                               |     |                    |                           |                                    |                     |     |             |     |                           |                       |                                                                                                       | P                                                                | N       | Nf      |          |         |           | P       | N       | Nf                                  |                              |                                    |                       |                     |          |                                                   |                       |    |  |  |  |  |  |
| 11                 |                   |                |       |                                             |          |            |               |                               |     |                    |                           |                                    |                     |     |             |     |                           |                       |                                                                                                       | P                                                                | N       | Nf      |          |         |           | P       | N       | Nf                                  |                              |                                    |                       |                     |          |                                                   |                       |    |  |  |  |  |  |
| 12                 |                   |                |       |                                             |          |            |               |                               |     |                    |                           |                                    |                     |     |             |     |                           |                       |                                                                                                       | P                                                                | N       | Nf      |          |         |           | P       | N       | Nf                                  |                              |                                    |                       |                     |          |                                                   |                       |    |  |  |  |  |  |
| 13                 |                   |                |       |                                             |          |            |               |                               |     |                    |                           |                                    |                     |     |             |     |                           |                       |                                                                                                       | P                                                                | N       | Nf      |          |         |           | P       | N       | Nf                                  |                              |                                    |                       |                     |          |                                                   |                       |    |  |  |  |  |  |
| 14                 |                   |                |       |                                             |          |            |               |                               |     |                    |                           |                                    |                     |     |             |     |                           |                       |                                                                                                       | P                                                                | N       | Nf      |          |         |           | P       | N       | Nf                                  |                              |                                    |                       |                     |          |                                                   |                       |    |  |  |  |  |  |
| 15                 |                   |                |       |                                             |          |            |               |                               |     |                    |                           |                                    |                     |     |             |     |                           |                       |                                                                                                       | P                                                                | N       | Nf      |          |         |           | P       | N       | Nf                                  |                              |                                    |                       |                     |          |                                                   |                       |    |  |  |  |  |  |
| 16                 |                   |                |       |                                             |          |            |               |                               |     |                    |                           |                                    |                     |     |             |     |                           |                       |                                                                                                       | P                                                                | N       | Nf      |          |         |           | P       | N       | Nf                                  |                              |                                    |                       |                     |          |                                                   |                       |    |  |  |  |  |  |
| 17                 |                   |                |       |                                             |          |            |               |                               |     |                    |                           |                                    |                     |     |             |     |                           |                       |                                                                                                       | P                                                                | N       | Nf      |          |         |           | P       | N       | Nf                                  |                              |                                    |                       |                     |          |                                                   |                       |    |  |  |  |  |  |
| 18                 |                   |                |       |                                             |          |            |               |                               |     |                    |                           |                                    |                     |     |             |     |                           |                       |                                                                                                       | P                                                                | N       | Nf      |          |         |           | P       | N       | Nf                                  |                              |                                    |                       |                     |          |                                                   |                       |    |  |  |  |  |  |
| 19                 |                   |                |       |                                             |          |            |               |                               |     |                    |                           |                                    |                     |     |             |     |                           |                       |                                                                                                       | P                                                                | N       | Nf      |          |         |           | P       | N       | Nf                                  |                              |                                    |                       |                     |          |                                                   |                       |    |  |  |  |  |  |
| 20                 |                   |                |       |                                             |          |            |               |                               |     |                    |                           |                                    |                     |     |             |     |                           |                       |                                                                                                       | P                                                                | N       | Nf      |          |         |           | P       | N       | Nf                                  |                              |                                    |                       |                     |          |                                                   |                       |    |  |  |  |  |  |
| 21                 |                   |                |       |                                             |          |            |               |                               |     |                    |                           |                                    |                     |     |             |     |                           |                       |                                                                                                       | P                                                                | N       | Nf      |          |         |           | P       | N       | Nf                                  |                              |                                    |                       |                     |          |                                                   |                       |    |  |  |  |  |  |
| 22                 |                   |                |       |                                             |          |            |               |                               |     |                    |                           |                                    |                     |     |             |     |                           |                       |                                                                                                       | P                                                                | N       | Nf      |          |         |           | P       | N       | Nf                                  |                              |                                    |                       |                     |          |                                                   |                       |    |  |  |  |  |  |
| 23                 |                   |                |       |                                             |          |            |               |                               |     |                    |                           |                                    |                     |     |             |     |                           |                       |                                                                                                       | P                                                                | N       | Nf      |          |         |           | P       | N       | Nf                                  |                              |                                    |                       |                     |          |                                                   |                       |    |  |  |  |  |  |
| 24                 |                   |                |       |                                             |          |            |               |                               |     |                    |                           |                                    |                     |     |             |     |                           |                       |                                                                                                       | P                                                                | N       | Nf      |          |         |           | P       | N       | Nf                                  |                              |                                    |                       |                     |          |                                                   |                       |    |  |  |  |  |  |
| 25                 |                   |                |       |                                             |          |            |               |                               |     |                    |                           |                                    |                     |     |             |     |                           |                       |                                                                                                       | P                                                                | N       | Nf      |          |         |           | P       | N       | Nf                                  |                              |                                    |                       |                     |          |                                                   |                       |    |  |  |  |  |  |
|                    |                   |                |       |                                             |          |            |               |                               |     |                    |                           |                                    |                     |     |             |     |                           |                       |                                                                                                       | Testados=                                                        | P       |         |          |         | Testados= |         |         | Total=                              |                              |                                    |                       |                     |          |                                                   |                       |    |  |  |  |  |  |
|                    |                   |                |       |                                             |          |            |               |                               |     |                    |                           |                                    |                     |     |             |     |                           |                       |                                                                                                       |                                                                  |         |         |          |         |           |         |         |                                     |                              |                                    |                       |                     |          |                                                   |                       |    |  |  |  |  |  |

Fig S6: Page 2 of the Mozambique national ANC logbook (each row represent one ANC visit).

| Livro de Registos da Consulta Pré-Natal - MOD SIS-B01                   |                             |               |                    |                             |                    |                             |                                   |                     |                                      |             |                       |                                           | Ano _____                                           |         |         |                          |                                     |             |                              |               |                 |                               |                      |                  |
|-------------------------------------------------------------------------|-----------------------------|---------------|--------------------|-----------------------------|--------------------|-----------------------------|-----------------------------------|---------------------|--------------------------------------|-------------|-----------------------|-------------------------------------------|-----------------------------------------------------|---------|---------|--------------------------|-------------------------------------|-------------|------------------------------|---------------|-----------------|-------------------------------|----------------------|------------------|
| Prevenção da transmissão vertical do HIV (marque com X o que se aplica) |                             |               |                    |                             |                    |                             |                                   |                     |                                      |             | Prevenção da malária  |                                           |                                                     |         |         | Diagnóstico e Tratamento | Referência para outra US ou Serviço | Observações | Nome do provedor de cuidados |               |                 |                               |                      |                  |
| Resultado do Teste HIV na CPN                                           |                             | Código de PTV | Profilaxia com CTZ |                             | Iniciou CTZ no mês | Continua toma de CTZ no mês | CD4 > 350 ou estado OMS III ou IV | Iniciou TARV no mês | Recebe profilaxia ARVs durante o mês |             |                       | Resultado do teste HIV do parceiro na CPN | Tratamento Intermitente Preventivo da Malária (TIP) |         |         |                          |                                     |             |                              | Recebe REMTIL |                 | Parceiro presente na consulta |                      |                  |
| Resultado do 1º teste                                                   | Resultado do teste seguinte |               | Iniciou CTZ no mês | Continua toma de CTZ no mês |                    |                             |                                   |                     | Inicia toma de                       |             |                       |                                           | 1ª Dose                                             | 2ª Dose | 3ª Dose |                          |                                     |             |                              | Na 1ª CPN     | Na CPN seguinte |                               |                      |                  |
|                                                                         |                             |               |                    |                             |                    |                             |                                   |                     | Biprofilaxia<br>AZT (≥ 14s)          | NVP (≥ 28s) | Monoprofilaxia (NV/P) |                                           |                                                     |         |         |                          |                                     |             |                              |               |                 |                               | Outro regime (qual?) | Continua (qual?) |
| 38                                                                      | 39                          | 40            | 41                 | 42                          | 43                 | 44                          | 45                                | 46                  | 47                                   | 48          | 49                    | 50                                        | 51                                                  | 52      | 53      | 54                       | 55                                  | 56          | 57                           | 58            | 59              | 60                            |                      |                  |
| 1                                                                       | P N I NF                    | P N I NF      |                    |                             |                    |                             |                                   |                     |                                      |             |                       |                                           | P N I NF                                            |         |         |                          |                                     |             |                              |               |                 |                               |                      |                  |
| 2                                                                       | P N I NF                    | P N I NF      |                    |                             |                    |                             |                                   |                     |                                      |             |                       |                                           | P N I NF                                            |         |         |                          |                                     |             |                              |               |                 |                               |                      |                  |
| 3                                                                       | P N I NF                    | P N I NF      |                    |                             |                    |                             |                                   |                     |                                      |             |                       |                                           | P N I NF                                            |         |         |                          |                                     |             |                              |               |                 |                               |                      |                  |
| 4                                                                       | P N I NF                    | P N I NF      |                    |                             |                    |                             |                                   |                     |                                      |             |                       |                                           | P N I NF                                            |         |         |                          |                                     |             |                              |               |                 |                               |                      |                  |
| 5                                                                       | P N I NF                    | P N I NF      |                    |                             |                    |                             |                                   |                     |                                      |             |                       |                                           | P N I NF                                            |         |         |                          |                                     |             |                              |               |                 |                               |                      |                  |
| 6                                                                       | P N I NF                    | P N I NF      |                    |                             |                    |                             |                                   |                     |                                      |             |                       |                                           | P N I NF                                            |         |         |                          |                                     |             |                              |               |                 |                               |                      |                  |
| 7                                                                       | P N I NF                    | P N I NF      |                    |                             |                    |                             |                                   |                     |                                      |             |                       |                                           | P N I NF                                            |         |         |                          |                                     |             |                              |               |                 |                               |                      |                  |
| 8                                                                       | P N I NF                    | P N I NF      |                    |                             |                    |                             |                                   |                     |                                      |             |                       |                                           | P N I NF                                            |         |         |                          |                                     |             |                              |               |                 |                               |                      |                  |
| 9                                                                       | P N I NF                    | P N I NF      |                    |                             |                    |                             |                                   |                     |                                      |             |                       |                                           | P N I NF                                            |         |         |                          |                                     |             |                              |               |                 |                               |                      |                  |
| 10                                                                      | P N I NF                    | P N I NF      |                    |                             |                    |                             |                                   |                     |                                      |             |                       |                                           | P N I NF                                            |         |         |                          |                                     |             |                              |               |                 |                               |                      |                  |
| 11                                                                      | P N I NF                    | P N I NF      |                    |                             |                    |                             |                                   |                     |                                      |             |                       |                                           | P N I NF                                            |         |         |                          |                                     |             |                              |               |                 |                               |                      |                  |
| 12                                                                      | P N I NF                    | P N I NF      |                    |                             |                    |                             |                                   |                     |                                      |             |                       |                                           | P N I NF                                            |         |         |                          |                                     |             |                              |               |                 |                               |                      |                  |
| 13                                                                      | P N I NF                    | P N I NF      |                    |                             |                    |                             |                                   |                     |                                      |             |                       |                                           | P N I NF                                            |         |         |                          |                                     |             |                              |               |                 |                               |                      |                  |
| 14                                                                      | P N I NF                    | P N I NF      |                    |                             |                    |                             |                                   |                     |                                      |             |                       |                                           | P N I NF                                            |         |         |                          |                                     |             |                              |               |                 |                               |                      |                  |
| 15                                                                      | P N I NF                    | P N I NF      |                    |                             |                    |                             |                                   |                     |                                      |             |                       |                                           | P N I NF                                            |         |         |                          |                                     |             |                              |               |                 |                               |                      |                  |
| 16                                                                      | P N I NF                    | P N I NF      |                    |                             |                    |                             |                                   |                     |                                      |             |                       |                                           | P N I NF                                            |         |         |                          |                                     |             |                              |               |                 |                               |                      |                  |
| 17                                                                      | P N I NF                    | P N I NF      |                    |                             |                    |                             |                                   |                     |                                      |             |                       |                                           | P N I NF                                            |         |         |                          |                                     |             |                              |               |                 |                               |                      |                  |
| 18                                                                      | P N I NF                    | P N I NF      |                    |                             |                    |                             |                                   |                     |                                      |             |                       |                                           | P N I NF                                            |         |         |                          |                                     |             |                              |               |                 |                               |                      |                  |
| 19                                                                      | P N I NF                    | P N I NF      |                    |                             |                    |                             |                                   |                     |                                      |             |                       |                                           | P N I NF                                            |         |         |                          |                                     |             |                              |               |                 |                               |                      |                  |
| 20                                                                      | P N I NF                    | P N I NF      |                    |                             |                    |                             |                                   |                     |                                      |             |                       |                                           | P N I NF                                            |         |         |                          |                                     |             |                              |               |                 |                               |                      |                  |
| 21                                                                      | P N I NF                    | P N I NF      |                    |                             |                    |                             |                                   |                     |                                      |             |                       |                                           | P N I NF                                            |         |         |                          |                                     |             |                              |               |                 |                               |                      |                  |
| 22                                                                      | P N I NF                    | P N I NF      |                    |                             |                    |                             |                                   |                     |                                      |             |                       |                                           | P N I NF                                            |         |         |                          |                                     |             |                              |               |                 |                               |                      |                  |
| 23                                                                      | P N I NF                    | P N I NF      |                    |                             |                    |                             |                                   |                     |                                      |             |                       |                                           | P N I NF                                            |         |         |                          |                                     |             |                              |               |                 |                               |                      |                  |
| 24                                                                      | P N I NF                    | P N I NF      |                    |                             |                    |                             |                                   |                     |                                      |             |                       |                                           | P N I NF                                            |         |         |                          |                                     |             |                              |               |                 |                               |                      |                  |
| 25                                                                      | P N I NF                    | P N I NF      |                    |                             |                    |                             |                                   |                     |                                      |             |                       |                                           | P N I NF                                            |         |         |                          |                                     |             |                              |               |                 |                               |                      |                  |
|                                                                         | Testadas P N                | Testadas P N  |                    |                             |                    |                             |                                   |                     |                                      |             |                       |                                           | Testados P                                          |         |         |                          |                                     |             |                              |               |                 |                               |                      |                  |

---
